# Supplementary material for: Body fat estimates from bioelectrical impedance equations in cardiovascular risk assessment: The PREVEND cohort study
Source: PubMed Central journal article supplement — Eur J Prev Cardiol. 2019 Feb 21;26(9):905–16. doi: 10.1177/2047487319833283 (PMC6545622; doi:10.1177/2047487319833283), 2019-02-21
Supplement: Supplemental_Material.pdf [file Supplemental_Material.pdf]

## SUPPLEMENTARY MATERIAL

### **Body Fat Estimates from Bioelectrical Impedance Equations in Cardiovascular Risk Assessment: the PREVEND Cohort Study**

Oyuntugs Byambasukh MD,MSc<sup>1,3</sup>, Michele F. Eisenga MD,MSc<sup>2</sup>, Ron T. Gansevoort MD,PhD<sup>2</sup>,  
Stephan J.L. Bakker MD,PhD<sup>2</sup>, Eva Corpeleijn PhD<sup>1</sup>

<sup>1</sup>Department of Epidemiology, University Medical Center Groningen, University of Groningen,  
Groningen, The Netherlands; <sup>2</sup>Department of Internal Medicine, University Medical Center  
Groningen, University of Groningen, Groningen, The Netherlands.

<sup>3</sup>Department of Internal Medicine, Mongolian National University of Medical Sciences,  
Ulaanbaatar, Mongolia.

#### Correspondence details:

Oyuntugs Byambasukh

Unit of Lifestyle Medicine in Obesity and Diabetes

Department of Epidemiology (FA40)

University Medical Center Groningen,

University of Groningen

PO Box 30 001

9700 RB Groningen, The Netherlands

Tel: +31 641152211

Email: [o.byambasukh@umcg.nl](mailto:o.byambasukh@umcg.nl); [oyuntugs@mnums.edu.mn](mailto:oyuntugs@mnums.edu.mn)

## Table of content

| <b>Content</b>                                                                                                    | <b>Page</b> |
|-------------------------------------------------------------------------------------------------------------------|-------------|
| Table S1. Bioelectrical impedance analysis equations tested in this study                                         | 3-4         |
| Table S2. Body fat estimates from different BIA-BF%-equations, according to sex and CV events                     | 5           |
| Table S3. Age-adjusted Pearson partial correlation coefficients of body fat estimates with other obesity measures | 6           |
| Table S4. Age-adjusted Pearson partial correlation coefficients of obesity measures with CVD risk factors         | 7           |
| Table S5A. Differences between body fat estimates and other obesity measures in men                               | 8           |
| Table S5B. Differences between body fat estimates and other obesity measures in women                             | 9           |
| Table S6. Model CV event prediction C-index for various BIA-BF%-equations                                         | 10          |
| Table S7. Risk reclassification improvement for CV event by obesity measures                                      | 11          |
| Figure S1. Flow chart of study population                                                                         | 12          |
| Figure S2. Associations between obesity measures and CV event by age categories                                   | 13          |
| Figure S3. Comparison between equations with and without age-incorporation                                        | 14          |

**Table S1. Bioelectrical impedance analysis equations tested in this study**

| Source               | Population                                                      | Formula                                                                                                                                                       |
|----------------------|-----------------------------------------------------------------|---------------------------------------------------------------------------------------------------------------------------------------------------------------|
| For fat mass         |                                                                 |                                                                                                                                                               |
| 1. BIA 101 AKERN     | NA                                                              | Unpublished inbuilt equation (default)                                                                                                                        |
| 2. Heitmann1         | 35-65 yr, 139 F & M<br><a href="#">(Danes)</a>                  | $-0.283 * \text{Height}^2/R - 0.222 * \text{Height} + 0.804 * \text{Weight} - 0.283 * (\text{Sex} * \text{Weight}) + 18.71$                                   |
| For lean body mass   |                                                                 |                                                                                                                                                               |
| 3. Heitmann2         | 35-65 yr, 139 F & M<br><a href="#">(Danes)</a>                  | $0.279 * \text{Height}^2/R + 0.181 * \text{Weight} + 0.231 * \text{Height} + 0.064 * (\text{Sex} * \text{Weight}) - 0.077 * \text{Age} - 14.94; M = 1, F = 2$ |
| 4. Segal1            | 17-62 yr, 498 F<br><a href="#">(American)</a>                   | $0.0011 * \text{Height}^2 - 0.02090 * R + 0.23199 * \text{Weight} - 0.0678 * \text{Age} + 14.594$                                                             |
| 5. Segal2            | 17-62 yr, 1069 M<br><a href="#">(American)</a>                  | $0.0013 * \text{Height}^2 - 0.04394 * R + 0.30520 * \text{Weight} - 0.16760 * \text{Age} + 22.668$                                                            |
| 6. Segal3            | 17-62 yr, 1069 M<br><a href="#">(American)</a>                  | $0.00066360 * \text{Height}^2 - 0.02117 * R + 0.62854 * \text{Weight} - 0.12380 * \text{Age} + 9.333$                                                         |
| 7. Segal4            | 17-62 yr, 1069 M<br><a href="#">(American)</a>                  | $0.00088580 * \text{Height}^2 - 0.02999 * R + 0.42688 * \text{Weight} - 0.07002 * \text{Age} + 14.524$                                                        |
| 8. Segal5            | 17-62 yr, 498 F<br><a href="#">(American)</a>                   | $0.00064602 * \text{Height}^2 - 0.01397 * R + 0.42087 * \text{Weight} + 10.435$                                                                               |
| 9. Segal6            | 17-62 yr, 498 F<br><a href="#">(American)</a>                   | $0.00091186 * \text{Height}^2 - 0.01466 * R + 0.29990 * \text{Weight} - 0.07015 * \text{Age} + 9.379$                                                         |
| 10. Van_Loan_Mayclin | 18-64 yr, 188 F&M<br><a href="#">(American)</a>                 | $0.000985 * \text{Height}^2 - 0.0238 * R + 0.3736 * \text{Weight} - 0.1531 * \text{Age} - 4.2921 * \text{Sex} + 14.595$                                       |
| For fat free mass    |                                                                 |                                                                                                                                                               |
| 11. Kyle             | 18-94 yr, 343 F&M<br><a href="#">(Swiss)</a>                    | $-4.104 + 0.518 * \text{Height}^2/R + 0.231 * \text{Weight} + 0.130 * Xc + 4.229 * \text{Sex}$                                                                |
| 12. Aglago1          | 18-64 yr, 256 F&M<br><a href="#">(Moroccan)</a>                 | $7.47 + 0.336 + 6.04 * \text{sex} + 0.306 * \text{Weight} - 0.063 * \text{age}; M = 1, F = 0$                                                                 |
| 13. Deurenberg       | 16-83 yr, <del>37 F, 35</del><br><del>661 F&amp;M (Dutch)</del> | $0.34 * \text{Height}^2/R + 0.1534 * \text{Height} + 0.273 * \text{Weight} - 0.127 * \text{age} + 4.56 * \text{sex} - 12.44; M = 1, F = 0$                    |
| 14. Boulier          | 12-71 yr, 202 F&M<br><a href="#">(French)</a>                   | $0.40 * \text{Height}^2/R + 0.64 * \text{Weight} - 0.16 * \text{Age} - 2.71 * \text{Sex} + 6.37; M = 1, F = 2$                                                |
| 15. Chumlea          | 12-80 yr <del>734 F&amp;M</del><br><a href="#">(American)</a>   | $M: 0.652 * \text{Height}^2/R + 0.262 * \text{Weight} + 0.015 * R - 10.678;$<br>$F: 0.696 * \text{Height}^2/R + 0.168 * \text{Weight} + 0.016 * R - 9.529$    |
| 16. Gray1            | 19-74 yr, 25 M<br><a href="#">(American)</a>                    | $0.00151 * \text{Height}^2 - 0.0344 * R + 0.140 * \text{Weight} - 0.158 * \text{Age} + 20.387$                                                                |
| 17. Gray2            | 19-74 yr, 41 F, 53 M<br><a href="#">(American)</a>              | $0.00139 * \text{Height}^2 - 0.0801 * R + 0.187 * \text{Weight} + 39.830$                                                                                     |
| 18. Jebb             | 16-78 yr, 205 F&M<br><a href="#">(American)</a>                 | $0.348613 * \text{Height}^2/R + 0.168998 * \text{Weight} + 13.96674$                                                                                          |
| 19. Lukaski1         | 18-50 yr, 67 F<br><a href="#">(American)</a>                    | $0.821 * \text{Height}^2/R + 4.917$                                                                                                                           |
| 20. Lukaski2         | 18-50 yr, 47 M<br><a href="#">(American)</a>                    | $0.827 * \text{Height}^2/R + 5.21$                                                                                                                            |
| 21. Lukaski3         | 18-50 yr, 47 M<br><a href="#">(American)</a>                    | $0.756 * \text{Height}^2/R + 0.110 * \text{Weight} + 0.107 * Xc - 5.463$                                                                                      |
| 22. Rising           | 22-38 yr, 56 F, 74 M<br><a href="#">(American)</a>              | $0.34 * \text{Height}^2/R + 0.33 * \text{Weight} - 0.14 * \text{Age} + 6.18 * \text{Sex} + 13.74; M = 1, F = 0$                                               |

|                        |                                            |                                                                                                                              |
|------------------------|--------------------------------------------|------------------------------------------------------------------------------------------------------------------------------|
| 23. Stolarczyk         | 18-60 yr, 151 F<br><u>(American)</u>       | $0.001254 * \text{Height}^2 - 0.04904 R + 0.1555 * \text{Weight} + 0.1417 X_c - 0.0833 * \text{Age} + 20.05$                 |
| 24. Wattanapenpaiboon1 | 26-86 yr, 66 M<br><u>(Australian)</u>      | $0.4936 * \text{Height}^2/R + 0.332 * \text{Weight} + 6.493$                                                                 |
| 25. Wattanapenpaiboon2 | 26-86 yr, 130 F<br><u>(Australian)</u>     | $0.6483 * \text{Height}^2/R + 0.1699 * \text{Weight} + 5.091$                                                                |
| <hr/>                  |                                            |                                                                                                                              |
| For total body water   |                                            |                                                                                                                              |
| 26. Sun                | 12-94 yr, 734 F&M<br><u>(American)</u>     | M: $0.45 * \text{Height}^2/R + 0.18 * \text{Weight} + 1.20$ ;<br>F: $0.45 * \text{Height}^2/R + 0.11 * \text{Weight} + 3.75$ |
| 27. Aglago2            | 18-64 yr, 256 F&M<br><u>(Moroccan)</u>     | $5.68 + 0.267 * \text{Height}^2/R + 4.42 * \text{sex} + 0.225 * \text{Weight} - 0.052 \text{ age}$ ; M = 1, F = 0            |
| 28. Heitmann3          | 35-65 yr, 139 F&M<br><u>(Danes)</u>        | $0.240 * \text{Height}^2/R + 0.172 * \text{Weight} + 0.040 (\text{Sex} * \text{Weight}) + 0.165 * \text{Height} - 17.58$     |
| 29. Kushner            | 0,02-67 yr, 116 F&M<br><u>(American)</u>   | $0.593 * \text{Height}^2/R + 0.065 * \text{Weight} + 0.04$                                                                   |
| 30. Kushner_Schoeller1 | 17-66 yr, 40 F&M<br><u>(American)</u>      | $0.556 * \text{Height}^2/R + 0.0955 * \text{Weight} + 1.726$                                                                 |
| 31. Kushner_Schoeller2 | 17-66 yr, 20 F<br><u>(American)</u>        | $0.382 * \text{Height}^2/R + 0.105 * \text{Weight} + 8.315$                                                                  |
| 32. Kushner_Schoeller3 | 17-66 yr, 20 M<br><u>(American)</u>        | $0.396 * \text{Height}^2/R + 0.143 * \text{Weight} + 8.399$                                                                  |
| 33. Lukaski_Bolunchuk1 | 20-73 yr, 28 F & 25 M<br><u>(American)</u> | $0.372 * \text{Height}^2/R + 0.142 * \text{Weight} + 3.05 \text{ Sex} - 0.069 * \text{Age} + 4.98$ ; M = 1, F = 0            |
| 34. Lukaski_Bolunchuk2 | 20-73 yr, 31 F & 26 M<br><u>(American)</u> | $0.374 * \text{Height}^2/R + 0.151 * \text{Weight} + 2.94 \text{ Sex} - 0.083 * \text{Age} + 4.65$ ; M = 1, F = 0            |

Abbreviations: R=resistance, Xc=reactance, M=male, F=female. Height in cm, weight in kg.

Selection (development) of above BIA equations from the validation studies was based on their prediction of the estimation by the BIA equations compared to measurements of reference methods such as densitometry (underwater weighting), dual-energy X-ray absorptiometry, isotope dilution methods and measurement of total body potassium.

**Table S2. Body fat estimates from different BIA-BF%-equations, according to sex and CV events**

| BIA-BF%-equations      | Man        |                 |            |         | Woman      |                 |            |         |
|------------------------|------------|-----------------|------------|---------|------------|-----------------|------------|---------|
|                        | Total      | Future CV event |            | t-value | Total      | Future CV event |            | t-value |
|                        |            | Without         | With       |         |            | Without         | With       |         |
| 1. BIA 101 AKERN       | 26.9 ± 6.3 | 26.5 ± 6.2      | 30.1 ± 5.8 | -10.82  | 36.3 ± 7.3 | 36.1 ± 7.3      | 40.2 ± 6.5 | -7.41   |
| 2. Heitmann1           | 33.8 ± 5.1 | 33.6 ± 5.1      | 35.2 ± 4.6 | -6.02   | 8.3 ± 6.3  | 8.2 ± 6.3       | 10.7 ± 6.0 | -4.92   |
| 3. Heitmann2           | 29.9 ± 5.4 | 29.6 ± 5.4      | 32.1 ± 4.6 | -9.72   | 41.6 ± 6.4 | 41.5 ± 6.4      | 44.9 ± 5.8 | -7.02   |
| 4. Segal1              | 37.1 ± 5.0 | 36.8 ± 5.0      | 39.2 ± 4.2 | -9.91   | 42.2 ± 5.6 | 42.0 ± 5.6      | 45.1 ± 5.1 | -7.19   |
| 5. Segal2              | 25.2 ± 5.2 | 24.9 ± 5.2      | 27.4 ± 4.3 | -10.01  | 34.4 ± 5.7 | 34.2 ± 5.7      | 37.2 ± 5.1 | -6.98   |
| 6. Segal3              | 23.8 ± 3.0 | 23.5 ± 2.9      | 25.8 ± 2.3 | -17.65  | 31.3 ± 3.3 | 31.1 ± 3.2      | 33.7 ± 2.9 | -10.32  |
| 7. Segal4              | 30.9 ± 3.4 | 30.7 ± 3.4      | 32.6 ± 2.8 | -12.38  | 38.5 ± 3.8 | 38.4 ± 3.8      | 40.6 ± 3.3 | -8.11   |
| 8. Segal5              | 31.4 ± 3.2 | 31.3 ± 3.2      | 32.2 ± 2.9 | -5.45   | 35.7 ± 3.6 | 35.6 ± 3.6      | 37.0 ± 3.5 | -4.61   |
| 9. Segal6              | 39.3 ± 4.1 | 39.0 ± 4.1      | 41.2 ± 3.3 | -11.32  | 43.9 ± 4.6 | 43.8 ± 4.6      | 46.6 ± 4.2 | -7.98   |
| 10. Van_loan_mayclin   | 30.2 ± 4.8 | 29.8 ± 4.8      | 33.1 ± 3.6 | -15.51  | 41.9 ± 4.9 | 41.7 ± 4.8      | 45.5 ± 4.1 | -10.74  |
| 11. Kyle               | 27.6 ± 5.2 | 27.4 ± 5.2      | 29.2 ± 4.9 | -6.53   | 36.6 ± 5.6 | 36.5 ± 5.7      | 38.7 ± 5.1 | -5.00   |
| 12. Aglago1            | 31.6 ± 4.1 | 31.5 ± 4.1      | 33.0 ± 3.7 | -7.45   | 41.7 ± 3.9 | 41.6 ± 3.9      | 43.5 ± 3.4 | -6.72   |
| 13. Deurenberg         | 31.6 ± 5.1 | 31.2 ± 5.1      | 34.2 ± 4.1 | -12.86  | 41.6 ± 5.4 | 41.4 ± 5.4      | 45.2 ± 4.6 | -9.62   |
| 14. Boulier            | 11.3 ± 4.1 | 11.0 ± 4.1      | 13.8 ± 3.6 | -13.98  | 20.3 ± 4.2 | 20.2 ± 4.2      | 23.3 ± 3.9 | -9.58   |
| 15. Chumlea            | 27.6 ± 4.8 | 27.5 ± 4.9      | 28.8 ± 4.5 | -5.37   | 37.8 ± 6.0 | 37.7 ± 6.0      | 39.8 ± 5.6 | -4.45   |
| 16. Gray1              | 35.0 ± 6.8 | 34.5 ± 6.8      | 38.6 ± 5.3 | -13.60  | 39.5 ± 7.9 | 39.3 ± 7.9      | 44.6 ± 6.8 | -9.18   |
| 17. Gray2              | 28.8 ± 5.6 | 28.7 ± 5.7      | 30.1 ± 5.3 | -4.89   | 39.2 ± 6.9 | 39.1 ± 6.9      | 40.6 ± 6.5 | -2.71   |
| 18. Jebb               | 39.8 ± 4.6 | 39.7 ± 4.6      | 40.5 ± 4.4 | -3.21   | 40.9 ± 5.7 | 40.8 ± 5.7      | 42.2 ± 5.4 | -3.01   |
| 19. Lukaski1           | 31.3 ± 7.1 | 31.1 ± 7.2      | 32.7 ± 6.7 | -4.25   | 39.7 ± 7.8 | 39.7 ± 7.8      | 41.8 ± 7.2 | -3.61   |
| 20. Lukaski1           | 30.5 ± 7.2 | 30.3 ± 7.2      | 31.9 ± 6.8 | -4.24   | 38.9 ± 7.9 | 38.8 ± 7.9      | 41.1 ± 7.3 | -3.61   |
| 21. Lukaski3           | 29.8 ± 6.2 | 29.6 ± 6.2      | 31.6 ± 5.8 | -6.30   | 37.3 ± 6.9 | 37.2 ± 6.9      | 39.7 ± 6.2 | -4.74   |
| 22. Rising             | 33.6 ± 4.2 | 33.3 ± 4.2      | 35.9 ± 3.5 | -12.77  | 27.2 ± 6.2 | 27.1 ± 6.2      | 30.5 ± 5.2 | -7.71   |
| 23. Stolarczyk         | 37.2 ± 5.9 | 36.8 ± 5.9      | 40.3 ± 4.9 | -12.35  | 41.8 ± 6.8 | 41.6 ± 6.8      | 45.7 ± 6.1 | -7.93   |
| 24. Wattanapenpaiboon1 | 21.3 ± 4.7 | 21.2 ± 4.7      | 22.2 ± 4.4 | -4.02   | 25.6 ± 5.3 | 25.6 ± 5.3      | 27.0 ± 4.9 | -3.48   |
| 25. Wattanapenpaiboon2 | 27.3 ± 5.8 | 27.2 ± 5.8      | 28.5 ± 5.4 | -4.19   | 33.7 ± 6.4 | 33.7 ± 6.4      | 35.4 ± 5.9 | -3.58   |
| 26. Sun                | 26.2 ± 5.2 | 26.1 ± 5.2      | 27.2 ± 4.9 | -4.34   | 37.7 ± 6.1 | 37.6 ± 6.1      | 39.3 ± 5.6 | -3.58   |
| 27. Aglago2            | 29.3 ± 4.4 | 29.1 ± 4.4      | 30.8 ± 3.9 | -7.81   | 39.7 ± 4.2 | 39.6 ± 4.2      | 41.7 ± 3.6 | -6.92   |
| 28. Heitmann3          | 31.8 ± 4.8 | 31.7 ± 4.8      | 33.3 ± 4.3 | -6.65   | 30.7 ± 5.7 | 30.6 ± 5.7      | 33.1 ± 5.4 | -5.36   |
| 29. Kushner            | 28.8 ± 6.6 | 28.7 ± 6.6      | 30.2 ± 6.3 | -4.41   | 38.2 ± 7.0 | 38.1 ± 7.0      | 40.1 ± 6.4 | -3.69   |
| 30. Kushner_schoeller1 | 25.8 ± 6.4 | 25.6 ± 6.4      | 27.1 ± 6.1 | -4.33   | 34.1 ± 6.9 | 34.0 ± 6.9      | 36.0 ± 6.3 | -3.66   |
| 31. Kushner_schoeller2 | 32.0 ± 5.5 | 31.9 ± 5.5      | 33.0 ± 5.3 | -3.74   | 35.7 ± 6.5 | 35.6 ± 6.5      | 37.3 ± 6.1 | -3.31   |
| 32. Kushner_schoeller3 | 25.2 ± 5.7 | 25.1 ± 5.7      | 26.2 ± 5.4 | -3.75   | 29.0 ± 6.7 | 29.0 ± 6.7      | 30.7 ± 6.3 | -3.32   |
| 33. Lukaski_bolunchuk1 | 34.5 ± 5.1 | 34.2 ± 5.1      | 36.5 ± 4.5 | -8.85   | 44.8 ± 5.3 | 44.6 ± 5.3      | 47.4 ± 4.5 | -7.22   |
| 34. Lukaski_bolunchuk2 | 35.1 ± 5.1 | 34.8 ± 5.1      | 37.3 ± 4.5 | -9.95   | 45.4 ± 5.2 | 45.3 ± 5.2      | 48.3 ± 4.4 | -7.94   |

Body fat estimates were expressed as percentage of total body weight (mean ± SD). Abbreviations: BIA=bioelectrical impedance analysis, LBM=lean body mass, FFM=fat free mass, TBW=total body water, CV=cardiovascular.

**Table S3. Age-adjusted Pearson partial correlation coefficients of body fat estimates with other obesity measures**

| BIA-BF%-equations      | Men   |       |       | Women |       |        |
|------------------------|-------|-------|-------|-------|-------|--------|
|                        | BMI   | WC    | CE    | BMI   | WC    | CE     |
| 1. BIA 101 AKERN       | 0.630 | 0.669 | 0.224 | 0.821 | 0.769 | 0.220  |
| 2. Heitmann1           | 0.906 | 0.852 | 0.376 | 0.923 | 0.823 | 0.258  |
| 3. Heitmann2           | 0.911 | 0.855 | 0.383 | 0.926 | 0.824 | 0.264  |
| 4. Segal1              | 0.952 | 0.870 | 0.413 | 0.921 | 0.815 | 0.241  |
| 5. Segal2              | 0.861 | 0.806 | 0.322 | 0.738 | 0.654 | 0.054  |
| 6. Segal3              | 0.663 | 0.571 | 0.133 | 0.381 | 0.289 | -0.209 |
| 7. Segal4              | 0.822 | 0.761 | 0.279 | 0.655 | 0.569 | -0.019 |
| 8. Segal5              | 0.950 | 0.888 | 0.435 | 0.928 | 0.837 | 0.277  |
| 9. Segal6              | 0.956 | 0.858 | 0.405 | 0.926 | 0.809 | 0.236  |
| 10. Van_loan_mayclin   | 0.918 | 0.837 | 0.369 | 0.767 | 0.650 | 0.055  |
| 11. Kyle               | 0.786 | 0.811 | 0.314 | 0.844 | 0.776 | 0.204  |
| 12. Aglago1            | 0.769 | 0.808 | 0.348 | 0.784 | 0.740 | 0.181  |
| 13. Deurenberg         | 0.826 | 0.792 | 0.311 | 0.813 | 0.708 | 0.112  |
| 14. Boulier            | 0.385 | 0.423 | 0.027 | 0.302 | 0.260 | -0.210 |
| 15. Chumlea            | 0.656 | 0.662 | 0.194 | 0.831 | 0.756 | 0.173  |
| 16. Gray1              | 0.920 | 0.831 | 0.363 | 0.856 | 0.744 | 0.147  |
| 17. Gray2              | 0.631 | 0.652 | 0.191 | 0.359 | 0.342 | -0.154 |
| 18. Jebb               | 0.796 | 0.833 | 0.378 | 0.861 | 0.822 | 0.309  |
| 19. Lukaski1           | 0.630 | 0.670 | 0.210 | 0.745 | 0.701 | 0.129  |
| 20. Lukaski1           | 0.632 | 0.673 | 0.213 | 0.748 | 0.704 | 0.132  |
| 21. Lukaski3           | 0.659 | 0.691 | 0.202 | 0.785 | 0.723 | 0.129  |
| 22. Rising             | 0.717 | 0.756 | 0.295 | 0.853 | 0.813 | 0.300  |
| 23. Stolarczyk         | 0.891 | 0.843 | 0.343 | 0.812 | 0.720 | 0.108  |
| 24. Wattanapenpaiboon1 | 0.687 | 0.728 | 0.262 | 0.793 | 0.750 | 0.188  |
| 25. Wattanapenpaiboon2 | 0.646 | 0.687 | 0.225 | 0.760 | 0.716 | 0.146  |
| 26. Sun                | 0.596 | 0.637 | 0.182 | 0.763 | 0.719 | 0.149  |
| 27. Aglago2            | 0.760 | 0.798 | 0.337 | 0.776 | 0.732 | 0.171  |
| 28. Heitmann3          | 0.862 | 0.803 | 0.319 | 0.891 | 0.781 | 0.190  |
| 29. Kushner            | 0.567 | 0.608 | 0.158 | 0.686 | 0.641 | 0.066  |
| 30. Kushner_schoeller1 | 0.601 | 0.642 | 0.186 | 0.719 | 0.674 | 0.100  |
| 31. Kushner_schoeller2 | 0.737 | 0.776 | 0.311 | 0.828 | 0.786 | 0.240  |
| 32. Kushner_schoeller3 | 0.734 | 0.774 | 0.308 | 0.826 | 0.785 | 0.237  |
| 33. Lukaski_bolunchuk1 | 0.676 | 0.716 | 0.254 | 0.720 | 0.675 | 0.106  |
| 34. Lukaski_bolunchuk2 | 0.650 | 0.690 | 0.230 | 0.688 | 0.642 | 0.074  |

Data are presented as age-adjusted Pearson partial correlation coefficients. Abbreviations: BMI=body mass index, WC=waist circumference, CE=creatinine excretion, All  $p$  value <0.001.

**Table S4. Age-adjusted Pearson partial correlation coefficients of obesity measures with CVD risk factors**

| Obesity measures       | Men    |       |       |       |       | Women  |       |       |       |       |
|------------------------|--------|-------|-------|-------|-------|--------|-------|-------|-------|-------|
|                        | HDL-c  | TG    | CRP   | SBP   | FRS   | HDL-c  | TG    | CRP   | SBP   | FRS   |
| Body mass index        | -0.302 | 0.249 | 0.062 | 0.307 | 0.140 | -0.296 | 0.237 | 0.216 | 0.237 | 0.098 |
| Waist circumference    | -0.310 | 0.253 | 0.106 | 0.314 | 0.150 | -0.326 | 0.276 | 0.210 | 0.241 | 0.153 |
| Body fat%              |        |       |       |       |       |        |       |       |       |       |
| 1. BIA 101 AKERN       | -0.235 | 0.182 | 0.110 | 0.216 | 0.120 | -0.272 | 0.222 | 0.200 | 0.201 | 0.081 |
| 2. Heitmann1           | -0.314 | 0.255 | 0.089 | 0.292 | 0.168 | -0.300 | 0.248 | 0.215 | 0.229 | 0.105 |
| 3. Heitmann2           | -0.315 | 0.257 | 0.088 | 0.294 | 0.170 | -0.300 | 0.245 | 0.217 | 0.232 | 0.108 |
| 4. Segal1              | -0.323 | 0.263 | 0.081 | 0.307 | 0.171 | -0.299 | 0.246 | 0.218 | 0.232 | 0.111 |
| 5. Segal2              | -0.301 | 0.256 | 0.097 | 0.284 | 0.180 | -0.251 | 0.214 | 0.202 | 0.186 | 0.109 |
| 6. Segal3              | -0.229 | 0.229 | 0.090 | 0.222 | 0.194 | -0.144 | 0.136 | 0.142 | 0.108 | 0.095 |
| 7. Segal4              | -0.287 | 0.252 | 0.098 | 0.272 | 0.185 | -0.227 | 0.198 | 0.190 | 0.168 | 0.108 |
| 8. Segal5              | -0.325 | 0.257 | 0.082 | 0.307 | 0.160 | -0.300 | 0.244 | 0.216 | 0.230 | 0.106 |
| 9. Segal6              | -0.322 | 0.265 | 0.078 | 0.308 | 0.174 | -0.301 | 0.248 | 0.218 | 0.235 | 0.113 |
| 10. Van_loan_mayclin   | -0.314 | 0.265 | 0.086 | 0.298 | 0.183 | -0.258 | 0.220 | 0.205 | 0.201 | 0.116 |
| 11. Kyle               | -0.278 | 0.213 | 0.110 | 0.265 | 0.148 | -0.256 | 0.208 | 0.203 | 0.205 | 0.092 |
| 12. Aglago1            | -0.284 | 0.220 | 0.101 | 0.252 | 0.145 | -0.258 | 0.214 | 0.205 | 0.191 | 0.097 |
| 13. Deurenberg         | -0.292 | 0.246 | 0.096 | 0.269 | 0.175 | -0.271 | 0.230 | 0.212 | 0.208 | 0.113 |
| 14. Boulier            | -0.157 | 0.156 | 0.099 | 0.134 | 0.147 | -0.117 | 0.116 | 0.133 | 0.080 | 0.080 |
| 15. Chumlea            | -0.242 | 0.210 | 0.104 | 0.217 | 0.159 | -0.275 | 0.231 | 0.212 | 0.204 | 0.104 |
| 16. Gray1              | -0.313 | 0.265 | 0.086 | 0.299 | 0.183 | -0.283 | 0.237 | 0.215 | 0.218 | 0.115 |
| 17. Gray2              | -0.238 | 0.208 | 0.111 | 0.217 | 0.158 | -0.138 | 0.127 | 0.138 | 0.086 | 0.079 |
| 18. Jebb               | -0.292 | 0.221 | 0.098 | 0.260 | 0.138 | -0.276 | 0.222 | 0.203 | 0.206 | 0.089 |
| 19. Lukaski1           | -0.239 | 0.200 | 0.107 | 0.210 | 0.148 | -0.250 | 0.211 | 0.201 | 0.179 | 0.097 |
| 20. Lukaski1           | -0.240 | 0.200 | 0.107 | 0.211 | 0.148 | -0.251 | 0.211 | 0.201 | 0.180 | 0.097 |
| 21. Lukaski3           | -0.241 | 0.199 | 0.113 | 0.224 | 0.153 | -0.249 | 0.208 | 0.204 | 0.191 | 0.096 |
| 22. Rising             | -0.268 | 0.216 | 0.103 | 0.237 | 0.154 | -0.272 | 0.219 | 0.203 | 0.206 | 0.090 |
| 23. Stolarczyk         | -0.301 | 0.243 | 0.102 | 0.301 | 0.171 | -0.251 | 0.207 | 0.205 | 0.204 | 0.103 |
| 24. Wattanapenpaiboon1 | -0.258 | 0.209 | 0.106 | 0.228 | 0.147 | -0.262 | 0.217 | 0.204 | 0.190 | 0.096 |
| 25. Wattanapenpaiboon2 | -0.245 | 0.202 | 0.107 | 0.215 | 0.148 | -0.254 | 0.213 | 0.202 | 0.183 | 0.097 |
| 26. Sun                | -0.228 | 0.194 | 0.107 | 0.200 | 0.147 | -0.254 | 0.213 | 0.202 | 0.184 | 0.097 |
| 27. Aglago2            | -0.281 | 0.219 | 0.101 | 0.250 | 0.147 | -0.256 | 0.212 | 0.204 | 0.189 | 0.097 |
| 28. Heitmann3          | -0.300 | 0.252 | 0.093 | 0.280 | 0.175 | -0.294 | 0.246 | 0.217 | 0.224 | 0.111 |
| 29. Kushner            | -0.218 | 0.188 | 0.107 | 0.191 | 0.147 | -0.234 | 0.201 | 0.194 | 0.165 | 0.096 |
| 30. Kushner_schoeller1 | -0.230 | 0.195 | 0.107 | 0.201 | 0.148 | -0.243 | 0.206 | 0.198 | 0.173 | 0.097 |
| 31. Kushner_schoeller2 | -0.274 | 0.215 | 0.104 | 0.243 | 0.145 | -0.270 | 0.221 | 0.205 | 0.198 | 0.094 |
| 32. Kushner_schoeller3 | -0.273 | 0.215 | 0.104 | 0.242 | 0.145 | -0.269 | 0.221 | 0.205 | 0.198 | 0.094 |
| 33. Lukaski_bolunchuk1 | -0.255 | 0.209 | 0.106 | 0.224 | 0.152 | -0.241 | 0.204 | 0.199 | 0.176 | 0.097 |
| 34. Lukaski_bolunchuk2 | -0.246 | 0.205 | 0.106 | 0.216 | 0.153 | -0.232 | 0.198 | 0.195 | 0.169 | 0.097 |

Data are presented as age-adjusted Pearson partial correlation coefficients. Abbreviations: HDL-c=high density lipoprotein cholesterol, TG=triglycerides, CRP=C-reactive protein, SBP=systolic blood pressure, FRS=Framingham CVD risk score. All  $p$  value <0.001.

Table S5A. Differences between body fat estimates and other obesity measures in men

| Obesity measures       | Regression |       | Comparison with BMI           |         |                  | Comparison with WC           |         |                  |
|------------------------|------------|-------|-------------------------------|---------|------------------|------------------------------|---------|------------------|
|                        | HR         | SE    | D <sub>HR</sub><br>(BF%, BMI) | z value | p value          | D <sub>HR</sub><br>(BF%, WC) | z value | p value          |
| Body mass index        | 1.34       | 0.055 | -                             | -       | -                | -                            | -       | -                |
| Waist circumference    | 1.56       | 0.054 | -                             | -       | -                | -                            | -       | -                |
| Body fat%              |            |       |                               |         |                  |                              |         |                  |
| 1. BIA 101 AKERN       | 2.13       | 0.071 | 0.46                          | 5.185   | <b>&lt;0.001</b> | 0.31                         | 3.517   | <b>&lt;0.001</b> |
| 2. Heitmann1           | 2.29       | 0.148 | 0.54                          | 3.416   | <b>0.001</b>     | 0.39                         | 2.460   | <b>0.014</b>     |
| 3. Heitmann2           | 2.08       | 0.085 | 0.44                          | 4.368   | <b>&lt;0.001</b> | 0.29                         | 2.887   | <b>0.004</b>     |
| 4. Segal1              | 1.75       | 0.065 | 0.27                          | 3.179   | <b>0.001</b>     | 0.12                         | 1.402   | 0.161            |
| 5. Segal2              | 1.93       | 0.075 | 0.37                          | 3.973   | <b>&lt;0.001</b> | 0.22                         | 2.351   | <b>0.019</b>     |
| 6. Segal3              | 3.97       | 0.095 | 1.09                          | 9.938   | <b>&lt;0.001</b> | 0.94                         | 8.585   | <b>&lt;0.001</b> |
| 7. Segal4              | 2.48       | 0.086 | 0.61                          | 6.060   | <b>&lt;0.001</b> | 0.46                         | 4.589   | <b>&lt;0.001</b> |
| 8. Segal5              | 1.41       | 0.067 | 0.05                          | 0.567   | 0.571            | -0.10                        | -1.195  | 0.232            |
| 9. Segal6              | 1.92       | 0.068 | 0.36                          | 4.155   | <b>&lt;0.001</b> | 0.21                         | 2.429   | <b>0.015</b>     |
| 10. Van_loan_mayclin   | 3.24       | 0.095 | 0.88                          | 8.069   | <b>&lt;0.001</b> | 0.73                         | 6.710   | <b>&lt;0.001</b> |
| 11. Kyle               | 1.58       | 0.072 | 0.16                          | 1.816   | 0.069            | 0.01                         | 0.145   | 0.885            |
| 12. Aglago1            | 1.83       | 0.085 | 0.31                          | 3.060   | <b>0.002</b>     | 0.16                         | 1.575   | 0.115            |
| 13. Deurenberg         | 2.48       | 0.083 | 0.62                          | 6.212   | <b>&lt;0.001</b> | 0.47                         | 4.708   | <b>&lt;0.001</b> |
| 14. Boulier            | 2.87       | 0.083 | 0.76                          | 7.704   | <b>&lt;0.001</b> | 0.61                         | 6.205   | <b>&lt;0.001</b> |
| 15. Chumlea            | 1.54       | 0.083 | 0.14                          | 1.419   | 0.156            | -0.01                        | -0.100  | 0.921            |
| 16. Gray1              | 2.10       | 0.066 | 0.45                          | 5.225   | <b>&lt;0.001</b> | 0.30                         | 3.480   | <b>0.001</b>     |
| 17. Gray2              | 1.44       | 0.075 | 0.07                          | 0.805   | 0.421            | -0.08                        | -0.831  | 0.406            |
| 18. Jebb               | 1.22       | 0.060 | -0.10                         | -1.195  | 0.232            | -0.25                        | -3.070  | <b>0.002</b>     |
| 19. Lukaski1           | 1.31       | 0.064 | -0.02                         | -0.229  | 0.819            | -0.17                        | -2.031  | <b>0.042</b>     |
| 20. Lukaski1           | 1.31       | 0.064 | -0.02                         | -0.243  | 0.808            | -0.17                        | -2.046  | <b>0.041</b>     |
| 21. Lukaski3           | 1.49       | 0.065 | 0.11                          | 1.292   | 0.196            | -0.04                        | -0.489  | 0.625            |
| 22. Rising             | 2.61       | 0.086 | 0.67                          | 6.562   | <b>&lt;0.001</b> | 0.51                         | 5.093   | <b>&lt;0.001</b> |
| 23. Stolarczyk         | 1.98       | 0.064 | 0.39                          | 4.644   | <b>&lt;0.001</b> | 0.24                         | 2.855   | <b>0.004</b>     |
| 24. Wattanapenpaiboon1 | 1.29       | 0.063 | -0.04                         | -0.489  | 0.625            | -0.19                        | -2.324  | <b>0.020</b>     |
| 25. Wattanapenpaiboon2 | 1.31       | 0.064 | -0.03                         | -0.307  | 0.759            | -0.18                        | -2.120  | <b>0.034</b>     |
| 26. Sun                | 1.44       | 0.084 | 0.07                          | 0.697   | 0.486            | -0.08                        | -0.820  | 0.412            |
| 27. Aglago2            | 1.86       | 0.085 | 0.33                          | 3.285   | <b>0.001</b>     | 0.18                         | 1.792   | 0.073            |
| 28. Heitmann3          | 1.44       | 0.060 | 0.08                          | 0.937   | 0.349            | -0.08                        | -0.938  | 0.348            |
| 29. Kushner            | 1.34       | 0.067 | 0.00                          | 0.032   | 0.974            | -0.15                        | -1.727  | 0.084            |
| 30. Kushner_schoeller1 | 1.33       | 0.066 | -0.01                         | -0.104  | 0.917            | -0.16                        | -1.886  | 0.059            |
| 31. Kushner_schoeller2 | 1.26       | 0.061 | -0.06                         | -0.791  | 0.429            | -0.22                        | -2.654  | <b>0.008</b>     |
| 32. Kushner_schoeller3 | 1.26       | 0.061 | -0.06                         | -0.775  | 0.439            | -0.21                        | -2.637  | <b>0.008</b>     |
| 33. Lukaski_bolunchuk1 | 1.92       | 0.079 | 0.36                          | 3.744   | <b>&lt;0.001</b> | 0.21                         | 2.175   | <b>0.030</b>     |
| 34. Lukaski_bolunchuk2 | 2.09       | 0.080 | 0.44                          | 4.582   | <b>&lt;0.001</b> | 0.29                         | 3.035   | <b>0.002</b>     |

Data are presented as difference between hazard ratios with z-value. Abbreviation: HR=hazard ratio, SE=standard errors, D=difference, BMI=body mass index, WC=waist circumference. Z-statistic test (z-value) was calculated and each BIA-BF%-equation was compared with the BMI and WC respectively. The z-value calculation was applied as  $z=(b[O1] - b[O2])/SE$ , and where  $b[O1]$  and  $b[O2]$  are regression coefficients of the obesity measures, while SE is the standard error of the difference in the coefficients. This was computed as the square root of the sum of the squares of the standard errors for two coefficients



**Table S5B. Differences between body fat estimates and other obesity measures in women**

| Obesity measures       | Regression |       | Comparison with BMI           |         |                  | Comparison with WC           |         |                  |
|------------------------|------------|-------|-------------------------------|---------|------------------|------------------------------|---------|------------------|
|                        | HR         | SE    | D <sub>HR</sub><br>(BF%, BMI) | z value | p value          | D <sub>HR</sub><br>(BF%, WC) | z value | p value          |
| Body mass index        | 1.52       | 0.073 | -                             | -       | -                | -                            | -       | -                |
| Waist circumference    | 1.35       | 0.058 | -                             | -       | -                | -                            | -       | -                |
| Body fat%              |            |       |                               |         |                  |                              |         |                  |
| 1. BIA 101 AKERN       | 1.89       | 0.34  | 0.095                         | 3.026   | <b>0.002</b>     | 0.22                         | 1.847   | 0.065            |
| 2. Heitmann1           | 2.42       | 0.58  | 0.181                         | 3.056   | <b>0.002</b>     | 0.47                         | 2.384   | <b>0.017</b>     |
| 3. Heitmann2           | 2.06       | 0.42  | 0.112                         | 3.372   | <b>0.001</b>     | 0.31                         | 2.310   | <b>0.021</b>     |
| 4. Segal1              | 1.81       | 0.30  | 0.089                         | 2.774   | <b>0.006</b>     | 0.18                         | 1.555   | 0.120            |
| 5. Segal2              | 2.02       | 0.40  | 0.111                         | 3.236   | <b>0.001</b>     | 0.29                         | 2.176   | <b>0.030</b>     |
| 6. Segal3              | 3.12       | 0.84  | 0.118                         | 6.346   | <b>&lt;0.001</b> | 0.72                         | 5.179   | <b>&lt;0.001</b> |
| 7. Segal4              | 2.46       | 0.60  | 0.124                         | 4.392   | <b>&lt;0.001</b> | 0.49                         | 3.373   | <b>0.001</b>     |
| 8. Segal5              | 1.53       | 0.12  | 0.092                         | 1.132   | 0.258            | 0.01                         | 0.062   | 0.951            |
| 9. Segal6              | 1.96       | 0.37  | 0.093                         | 3.427   | <b>0.001</b>     | 0.26                         | 2.193   | <b>0.028</b>     |
| 10. Van_loan_mayclin   | 3.80       | 1.03  | 0.146                         | 6.599   | <b>0.000</b>     | 0.92                         | 5.635   | <b>&lt;0.001</b> |
| 11. Kyle               | 1.63       | 0.19  | 0.105                         | 1.581   | 0.114            | 0.07                         | 0.579   | 0.562            |
| 12. Aglago1            | 2.35       | 0.55  | 0.144                         | 3.554   | <b>&lt;0.001</b> | 0.44                         | 2.700   | <b>0.007</b>     |
| 13. Deurenberg         | 2.77       | 0.72  | 0.123                         | 5.276   | <b>&lt;0.001</b> | 0.60                         | 4.207   | <b>&lt;0.001</b> |
| 14. Boulier            | 3.00       | 0.80  | 0.123                         | 5.862   | <b>&lt;0.001</b> | 0.68                         | 4.762   | <b>&lt;0.001</b> |
| 15. Chumlea            | 1.56       | 0.14  | 0.105                         | 1.210   | 0.226            | 0.03                         | 0.228   | 0.820            |
| 16. Gray1              | 2.04       | 0.41  | 0.089                         | 3.882   | <b>&lt;0.001</b> | 0.30                         | 2.571   | <b>0.010</b>     |
| 17. Gray2              | 1.30       | -0.04 | 0.098                         | -0.333  | 0.739            | -0.15                        | -1.258  | 0.208            |
| 18. Jebb               | 1.25       | -0.07 | 0.076                         | -0.761  | 0.447            | -0.19                        | -1.784  | 0.074            |
| 19. Lukaski1           | 1.38       | 0.02  | 0.093                         | 0.202   | 0.840            | -0.09                        | -0.788  | 0.431            |
| 20. Lukaski1           | 1.38       | 0.02  | 0.093                         | 0.188   | 0.851            | -0.10                        | -0.803  | 0.422            |
| 21. Lukaski3           | 1.51       | 0.11  | 0.093                         | 1.005   | 0.315            | -0.01                        | -0.048  | 0.962            |
| 22. Rising             | 1.81       | 0.30  | 0.090                         | 2.764   | <b>0.006</b>     | 0.18                         | 1.552   | 0.121            |
| 23. Stolarczyk         | 1.88       | 0.33  | 0.088                         | 3.135   | <b>0.002</b>     | 0.21                         | 1.873   | 0.061            |
| 24. Wattanapenpaiboon1 | 1.33       | -0.02 | 0.087                         | -0.175  | 0.861            | -0.13                        | -1.181  | 0.238            |
| 25. Wattanapenpaiboon2 | 1.37       | 0.01  | 0.091                         | 0.118   | 0.906            | -0.10                        | -0.879  | 0.380            |
| 26. Sun                | 1.46       | 0.08  | 0.112                         | 0.652   | 0.515            | -0.03                        | -0.252  | 0.801            |
| 27. Aglago2            | 2.36       | 0.56  | 0.142                         | 3.644   | <b>&lt;0.001</b> | 0.44                         | 2.772   | <b>0.006</b>     |
| 28. Heitmann3          | 1.50       | 0.11  | 0.078                         | 1.086   | 0.277            | -0.01                        | -0.095  | 0.924            |
| 29. Kushner            | 1.43       | 0.06  | 0.101                         | 0.476   | 0.634            | -0.06                        | -0.480  | 0.631            |
| 30. Kushner_schoeller1 | 1.40       | 0.04  | 0.097                         | 0.335   | 0.738            | -0.08                        | -0.640  | 0.522            |
| 31. Kushner_schoeller2 | 1.30       | -0.04 | 0.081                         | -0.388  | 0.698            | -0.15                        | -1.413  | 0.158            |
| 32. Kushner_schoeller3 | 1.30       | -0.04 | 0.081                         | -0.372  | 0.710            | -0.15                        | -1.396  | 0.163            |
| 33. Lukaski_bolunchuk1 | 2.20       | 0.49  | 0.125                         | 3.538   | <b>&lt;0.001</b> | 0.37                         | 2.565   | <b>0.010</b>     |
| 34. Lukaski_bolunchuk2 | 2.40       | 0.58  | 0.128                         | 4.113   | <b>&lt;0.001</b> | 0.46                         | 3.134   | <b>0.002</b>     |

Data are presented as difference between hazard ratios with z-value. Abbreviation: HR=hazard ratio, SE=standard errors, D=difference, BMI=body mass index, WC=waist circumference. Z-statistic test (z-value) was calculated and each BIA-BF%-equation was compared with the BMI and WC respectively. The z-value calculation was applied as  $z=(b[O1] - b[O2])/SE$ , and where  $b[O1]$  and  $b[O2]$  are regression coefficients of the obesity measures, while SE is the standard error of the difference in the coefficients. This was computed as the square root of the sum of the squares of the standard errors for two coefficients

**Table S6. Model CV event prediction C-index for various BIA-BF%-equations**

| <b>Man</b>                | <b>C-index (95%CI)</b> | <b>p value</b>    | <b>C-Index changes (95%CI)</b> | <b>p value</b>    |
|---------------------------|------------------------|-------------------|--------------------------------|-------------------|
| Base model                | 0.700 (0.678; 0.723)   | <b>&lt;0.0001</b> | -                              | -                 |
| <b>Extended models</b>    |                        |                   |                                |                   |
| Base + BIA 101 AKERN      | 0.722 (0.700; 0.745)   | <b>&lt;0.0001</b> | 0.022 (0.009; 0.034)           | <b>0.0009</b>     |
| Base + Heitmann1          | 0.705 (0.682; 0.727)   | <b>&lt;0.0001</b> | 0.005 (-0.002; 0.011)          | <b>0.014</b>      |
| Base + Heitmann2          | 0.713 (0.691; 0.735)   | <b>&lt;0.0001</b> | 0.013 (0.002; 0.024)           | <b>0.026</b>      |
| Base + Segal1             | 0.713 (0.691; 0.736)   | <b>&lt;0.0001</b> | 0.013 (0.003; 0.024)           | <b>0.013</b>      |
| Base + Segal2             | 0.713 (0.691; 0.736)   | <b>&lt;0.0001</b> | 0.013 (0.003; 0.024)           | <b>0.023</b>      |
| Base + Segal3             | 0.743 (0.722; 0.765)   | <b>&lt;0.0001</b> | 0.043 (0.026; 0.061)           | <b>&lt;0.0001</b> |
| Base + Segal4             | 0.720 (0.698; 0.743)   | <b>&lt;0.0001</b> | 0.021 (0.007; 0.033)           | <b>0.002</b>      |
| Base + Segal5             | 0.704 (0.682; 0.727)   | <b>&lt;0.0001</b> | 0.004 (-0.002; 0.010)          | 0.192             |
| Base + Segal6             | 0.717 (0.695; 0.740)   | <b>&lt;0.0001</b> | 0.017 (0.006; 0.029)           | <b>0.003</b>      |
| Base + Van_loan_mayclin   | 0.731 (0.709; 0.753)   | <b>&lt;0.0001</b> | 0.031 (0.015; 0.047)           | <b>&lt;0.0001</b> |
| Base + Kyle               | 0.707 (0.684; 0.729)   | <b>&lt;0.0001</b> | 0.007 (-0.002; 0.016)          | 0.134             |
| Base + Aglago1            | 0.707 (0.684; 0.730)   | <b>&lt;0.0001</b> | 0.007 (-0.001; 0.015)          | 0.087             |
| Base + Deurenberg         | 0.722 (0.700; 0.745)   | <b>&lt;0.0001</b> | 0.022 (0.010; 0.034)           | <b>0.0002</b>     |
| Base + Chumlea            | 0.703 (0.681; 0.726)   | <b>&lt;0.0001</b> | 0.003 (-0.002; 0.008)          | 0.215             |
| Base + Gray1              | 0.724 (0.702; 0.746)   | <b>&lt;0.0001</b> | 0.024 (0.011; 0.037)           | <b>0.0002</b>     |
| Base + Gray2              | 0.703 (0.680; 0.725)   | <b>&lt;0.0001</b> | 0.003 (-0.002; 0.008)          | 0.324             |
| Base + Jebb               | 0.701 (0.680; 0.723)   | <b>&lt;0.0001</b> | 0.001 (-0.003; 0.005)          | 0.586             |
| Base + Lukaski1           | 0.702 (0.679; 0.724)   | <b>&lt;0.0001</b> | 0.002 (-0.003; 0.006)          | 0.470             |
| Base + Lukaski2           | 0.702 (0.680; 0.724)   | <b>&lt;0.0001</b> | 0.002 (-0.003; 0.006)          | 0.492             |
| Base + Lukaski3           | 0.706 (0.683; 0.728)   | <b>&lt;0.0001</b> | 0.006 (-0.003; 0.014)          | 0.200             |
| Base + Rising             | 0.723 (0.700; 0.745)   | <b>&lt;0.0001</b> | 0.023 (0.007; 0.039)           | <b>0.004</b>      |
| Base + Stolarczyk         | 0.723 (0.700; 0.745)   | <b>&lt;0.0001</b> | 0.023 (0.008; 0.034)           | <b>0.002</b>      |
| Base + Wattanapenpaiboon1 | 0.701 (0.680; 0.724)   | <b>&lt;0.0001</b> | 0.001 (-0.004; 0.006)          | 0.561             |
| Base + Wattanapenpaiboon2 | 0.702 (0.679; 0.724)   | <b>&lt;0.0001</b> | 0.002 (-0.004; 0.007)          | 0.542             |
| Base + Sun                | 0.702 (0.679; 0.724)   | <b>&lt;0.0001</b> | 0.002 (-0.002; 0.006)          | 0.402             |
| Base + Aglago2            | 0.708 (0.685; 0.730)   | <b>&lt;0.0001</b> | 0.008 (-0.002; 0.018)          | 0.136             |
| Base + Heitmann3          | 0.706 (0.683; 0.728)   | <b>&lt;0.0001</b> | 0.005 (-0.002; 0.014)          | 0.141             |
| Base + Kushner            | 0.702 (0.679; 0.725)   | <b>&lt;0.0001</b> | 0.002 (-0.003; 0.007)          | 0.420             |
| Base + Kushner_schoeller1 | 0.702 (0.679; 0.724)   | <b>&lt;0.0001</b> | 0.002 (-0.002; 0.006)          | 0.399             |
| Base + Kushner_schoeller2 | 0.701 (0.679; 0.724)   | <b>&lt;0.0001</b> | 0.001 (-0.003; 0.005)          | 0.526             |
| Base + Kushner_schoeller3 | 0.701 (0.679; 0.724)   | <b>&lt;0.0001</b> | 0.001 (-0.002; 0.005)          | 0.508             |
| Base + Lukaski_bolunchuk1 | 0.710 (0.687; 0.732)   | <b>&lt;0.0001</b> | 0.010 (-0.001; 0.022)          | 0.085             |
| Base + Lukaski_bolunchuk2 | 0.713 (0.691; 0.736)   | <b>&lt;0.0001</b> | 0.013 (0.016; 0.025)           | <b>0.026</b>      |
| <b>Woman</b>              |                        |                   |                                |                   |
| Base model                | 0.751 (0.718; 0.784)   | <b>&lt;0.0001</b> | -                              | -                 |
| <b>Extended models</b>    |                        |                   |                                |                   |
| Base + Van_loan_mayclin   | 0.774 (0.742; 0.806)   | <b>&lt;0.0001</b> | 0.023 (0.006; 0.041)           | <b>0.010</b>      |

Data are presented as C-indexes with 95%CI and changes between base and extended model with 95%CI. Base model: Framingham CVD risk score including age, total and HDL cholesterol level, current smoking status, systolic blood pressure, anti-hypertensive medication use and diabetes. Data are presented if the equations remained significant after adjustments for age, Framingham CVD risk score and creatinine excretion - a marker of muscle mass.

**Table S7. Risk reclassification improvement for CV event by obesity measures**

| <b>Man</b>                | NRI (95%CI)           | <i>p</i> value    | IDI (95%CI)          | <i>p</i> value    |
|---------------------------|-----------------------|-------------------|----------------------|-------------------|
| Base + BMI                | 0.149 (0.072; 0.202)  | <b>0.007</b>      | 0.003 (0.001; 0.009) | <b>0.013</b>      |
| Base + WC                 | 0.183 (0.094; 0.252)  | <b>&lt;0.0001</b> | 0.009 (0.003; 0.018) | <b>0.0001</b>     |
| Base + BIA 101 AKERN      | 0.149 (0.068; 0.210)  | <b>0.0001</b>     | 0.003 (0.000; 0.009) | <b>0.0001</b>     |
| Base + Heitmann1          | 0.175 (0.106; 0.244)  | <b>&lt;0.0001</b> | 0.005 (0.001; 0.013) | <b>&lt;0.0001</b> |
| Base + Heitmann2          | 0.235 (0.172; 0.305)  | <b>&lt;0.0001</b> | 0.013 (0.006; 0.024) | <b>&lt;0.0001</b> |
| Base + Segal1             | 0.225 (0.157; 0.278)  | <b>&lt;0.0001</b> | 0.013 (0.005; 0.022) | <b>&lt;0.0001</b> |
| Base + Segal2             | 0.216 (0.153; 0.283)  | <b>&lt;0.0001</b> | 0.014 (0.007; 0.024) | <b>&lt;0.0001</b> |
| Base + Segal3             | 0.322 (0.249; 0.379)  | <b>&lt;0.0001</b> | 0.043 (0.029; 0.060) | <b>&lt;0.0001</b> |
| Base + Segal4             | 0.288 (0.208; 0.341)  | <b>&lt;0.0001</b> | 0.021 (0.011; 0.035) | <b>&lt;0.0001</b> |
| Base + Segal5             | 0.173 (0.098; 0.238)  | <b>0.007</b>      | 0.004 (0.001; 0.011) | <b>0.0001</b>     |
| Base + Segal6             | 0.236 (0.164; 0.312)  | <b>&lt;0.0001</b> | 0.016 (0.007; 0.027) | <b>&lt;0.0001</b> |
| Base + Van_loan_mayclin   | 0.298 (0.228; 0.360)  | <b>&lt;0.0001</b> | 0.031 (0.019; 0.045) | <b>&lt;0.0001</b> |
| Base + Kyle               | 0.186 (0.106; 0.250)  | <b>&lt;0.0001</b> | 0.007 (0.002; 0.016) | <b>&lt;0.0001</b> |
| Base + Aglago1            | 0.193 (0.120; 0.268)  | <b>0.007</b>      | 0.009 (0.003; 0.019) | <b>0.007</b>      |
| Base + Deurenberg         | 0.309 (0.237; 0.369)  | <b>&lt;0.0001</b> | 0.024 (0.013; 0.038) | <b>&lt;0.0001</b> |
| Base + Chumlea            | 0.166 (0.104; 0.239)  | <b>0.007</b>      | 0.005 (0.001; 0.014) | <b>0.007</b>      |
| Base + Gray1              | 0.293 (0.220; 0.353)  | <b>&lt;0.0001</b> | 0.024 (0.014; 0.035) | <b>&lt;0.0001</b> |
| Base + Gray2              | 0.149 (0.073; 0.221)  | <b>0.007</b>      | 0.005 (0.001; 0.012) | <b>0.007</b>      |
| Base + Jebb               | 0.128 (-0.152; 0.202) | 0.166             | 0.002 (0.000; 0.008) | 0.093             |
| Base + Lukaski1           | 0.158 (0.002; 0.225)  | <b>0.047</b>      | 0.004 (0.000; 0.011) | <b>0.020</b>      |
| Base + Lukaski2           | 0.160 (-0.012; 0.224) | 0.066             | 0.004 (0.000; 0.010) | <b>0.033</b>      |
| Base + Lukaski3           | 0.179 (0.103; 0.245)  | <b>0.007</b>      | 0.007 (0.002; 0.017) | <b>0.007</b>      |
| Base + Rising             | 0.298 (0.218; 0.361)  | <b>&lt;0.0001</b> | 0.025 (0.013; 0.041) | <b>&lt;0.0001</b> |
| Base + Stolarczyk         | 0.260 (0.182; 0.330)  | <b>&lt;0.0001</b> | 0.021 (0.011; 0.034) | <b>&lt;0.0001</b> |
| Base + Wattanapenpaiboon1 | 0.135 (0.01; 0.209)   | <b>0.040</b>      | 0.003 (0.00; 0.011)  | <b>0.033</b>      |
| Base + Wattanapenpaiboon2 | 0.146 (0.043; 0.212)  | <b>0.013</b>      | 0.004 (0.000; 0.010) | <b>0.013</b>      |
| Base + Sun                | 0.160 (0.059; 0.230)  | <b>0.033</b>      | 0.004 (0.000; 0.011) | <b>0.033</b>      |
| Base + Aglago2            | 0.203 (0.126; 0.269)  | <b>&lt;0.0001</b> | 0.010 (0.004; 0.021) | <b>&lt;0.0001</b> |
| Base + Heitmann3          | 0.177 (0.107; 0.234)  | <b>&lt;0.0001</b> | 0.007 (0.002; 0.013) | <b>&lt;0.0001</b> |
| Base + Kushner            | 0.157 (-0.005; 0.225) | 0.053             | 0.004 (0.000; 0.011) | <b>0.040</b>      |
| Base + Kushner_schoeller1 | 0.160 (-0.05; 0.225)  | 0.073             | 0.004 (0.00; 0.011)  | 0.053             |
| Base + Kushner_schoeller2 | 0.136 (-0.043; 0.193) | 0.060             | 0.003 (0.000; 0.009) | <b>0.033</b>      |
| Base + Kushner_schoeller3 | 0.133 (-0.08; 0.204)  | 0.080             | 0.003 (0.00; 0.008)  | <b>0.047</b>      |
| Base + Lukaski_bolunchuk1 | 0.197 (0.128; 0.258)  | <b>&lt;0.0001</b> | 0.013 (0.005; 0.024) | <b>&lt;0.0001</b> |
| Base + Lukaski_bolunchuk2 | 0.222 (0.156; 0.290)  | <b>&lt;0.0001</b> | 0.016 (0.008; 0.028) | <b>&lt;0.0001</b> |
| <b>Woman</b>              |                       |                   |                      |                   |
| Base + BMI                | 0.122 (-0.006; 0.215) | <b>0.066</b>      | 0.001 (0.000; 0.008) | 0.199             |
| Base + WC                 | 0.053 (-0.057; 0.157) | <b>0.246</b>      | 0.001 (0.000; 0.006) | 0.279             |
| Base + Van_loan_mayclin   | 0.248 (0.157; 0.343)  | <b>0.0001</b>     | 0.002 (0.002; 0.023) | <b>0.0001</b>     |

Data are presented as category-free NRI with 95%CI and IDI with 95%CI showing improvement in risk prediction between the base model and extended models. Abbreviation: BMI=body mass index, WC=waist circumference. Base model: Framingham risk score including age, HDL cholesterol, smoking status, systolic blood pressure and treatment of hypertension and diabetes. Data are presented if the measures remained significant after adjustments for age, Framingham CVD risk score and creatinine excretion - a marker of muscle mass.

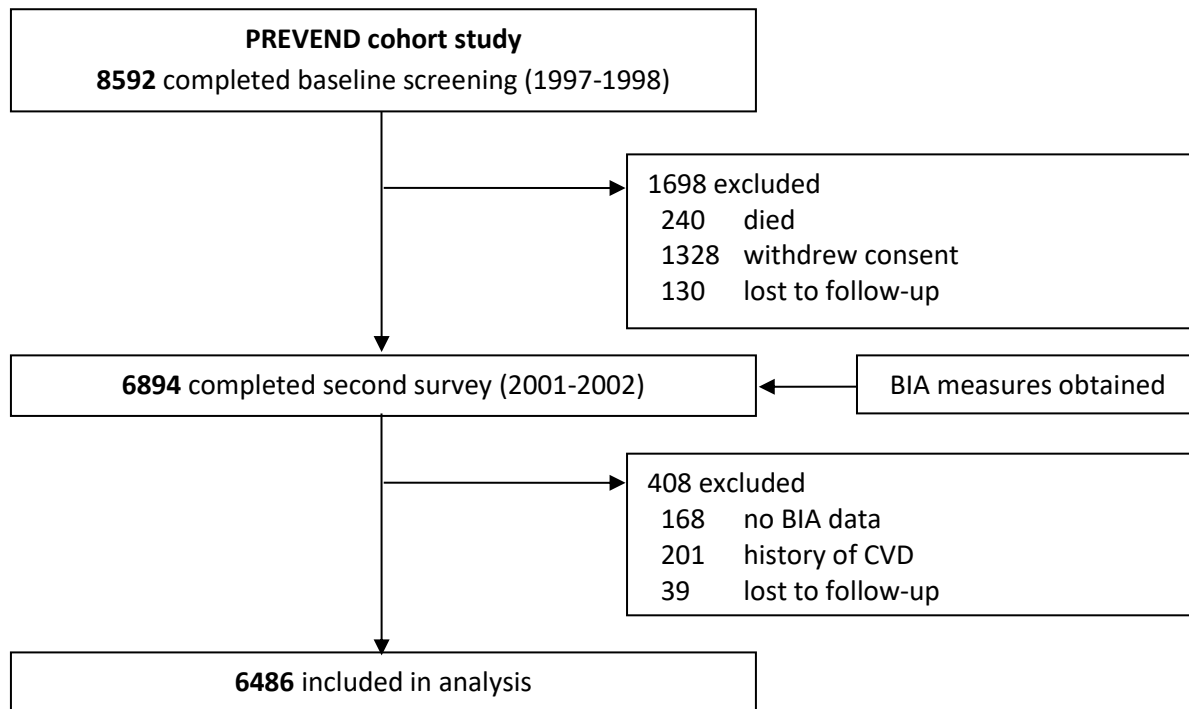

**Figure S1.** Flow chart of study population.

BIA=Bio-electrical impedance analysis

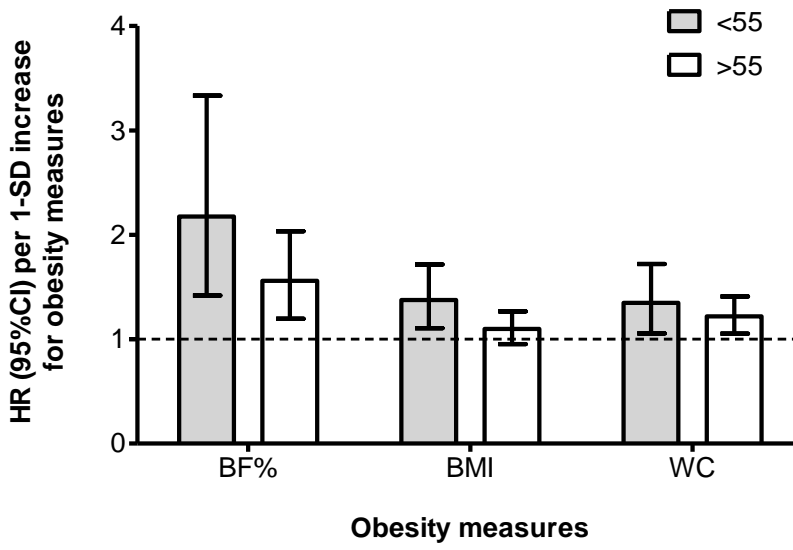

**Figure S2.** Associations between obesity measures and CV event by age categories.

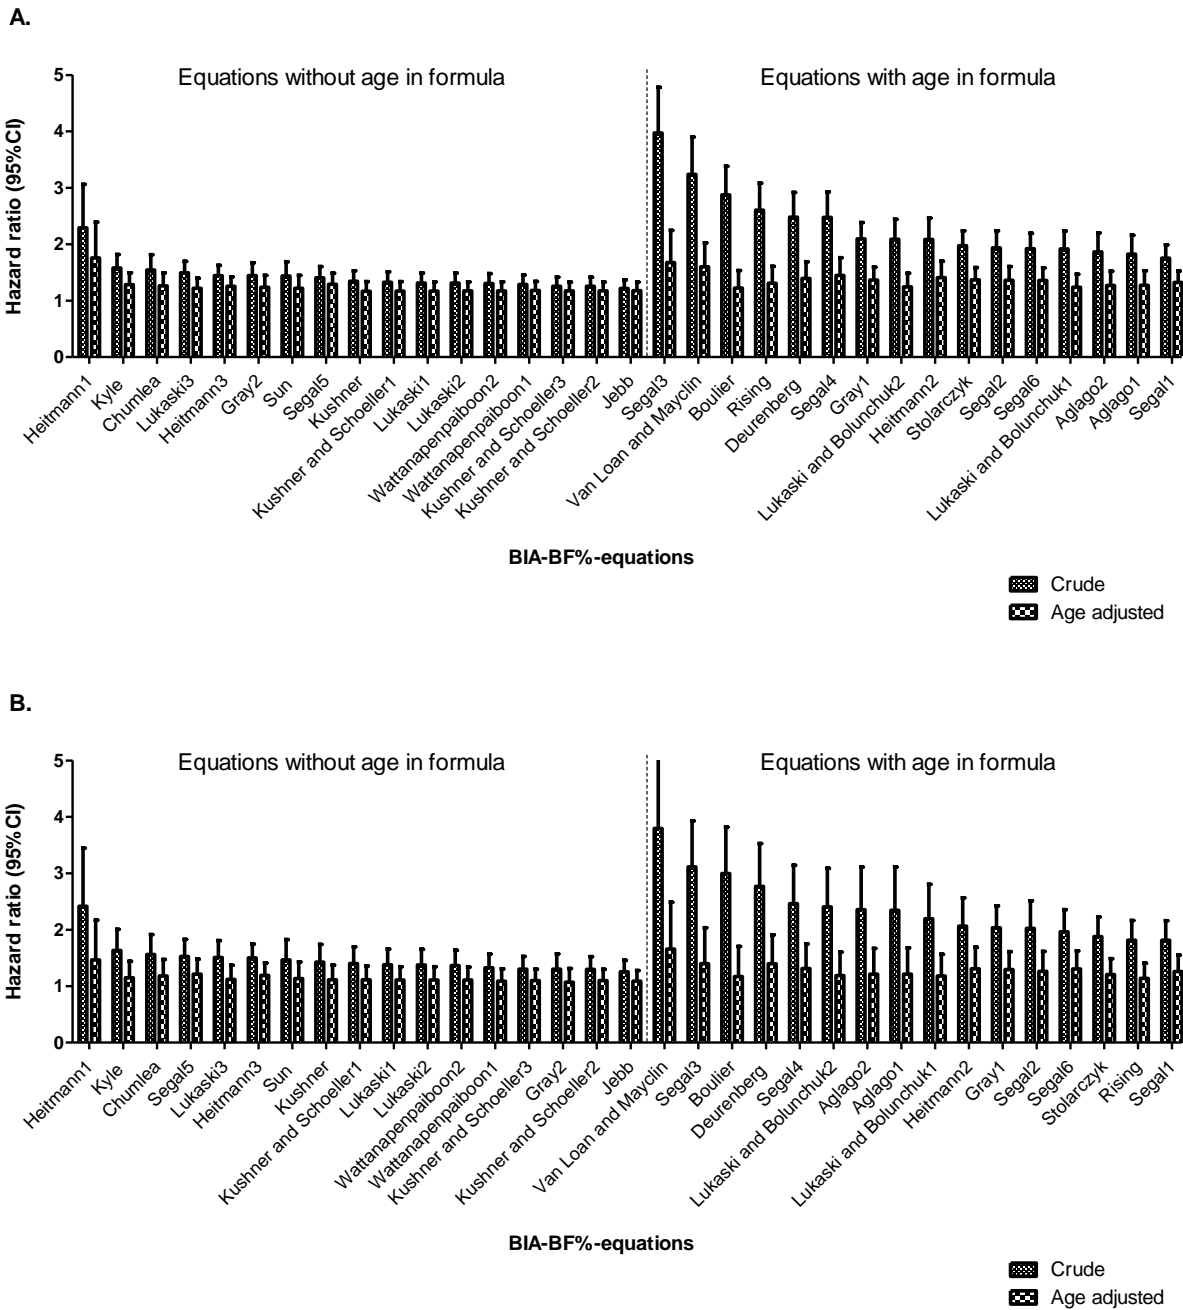

**Figure S3.** Comparison between equations with and without age-incorporation (A) Men. (B) Women.
